# Supplementary material for: Environmental Fate of Glyphosate in Citrus Production Soils of Florida
Source: Preprints.org preprint supplement (doi:10.20944/preprints202106.0591.v1), 2021-06-23
Supplement: Supplementary file 1 [file supplementary]

**Table S1.** High-performance liquid chromatography-mass spectrometry (HPLC-MS) conditions used for the analysis of glyphosate.

| HPLC-MS conditions        | Description/Value                               |
|---------------------------|-------------------------------------------------|
| Mobile phases:            |                                                 |
| <i>Mobile Phase A</i>     | <i>50 mM Ammonium formate in Water (pH 2.9)</i> |
| <i>Mobile Phase B</i>     | <i>Acetonitrile</i>                             |
| Equilibration time        | 6 mins                                          |
| Gradient:                 |                                                 |
| <i>Mobile Phase A</i>     | <i>100% (0-3 mins)</i>                          |
| <i>Mobile Phase B</i>     | <i>0 to 100% (3-6 mins)</i>                     |
| Column                    | Acclaim Trinity™ Q1, 3 x 100 mm                 |
| MS conditions:            |                                                 |
| <i>Ionization</i>         | <i>-ve</i>                                      |
| <i>Probe temperature</i>  | <i>550 °C</i>                                   |
| <i>Cone voltage</i>       | <i>60 V</i>                                     |
| Glyphosate retention time | ~2.69 mins                                      |

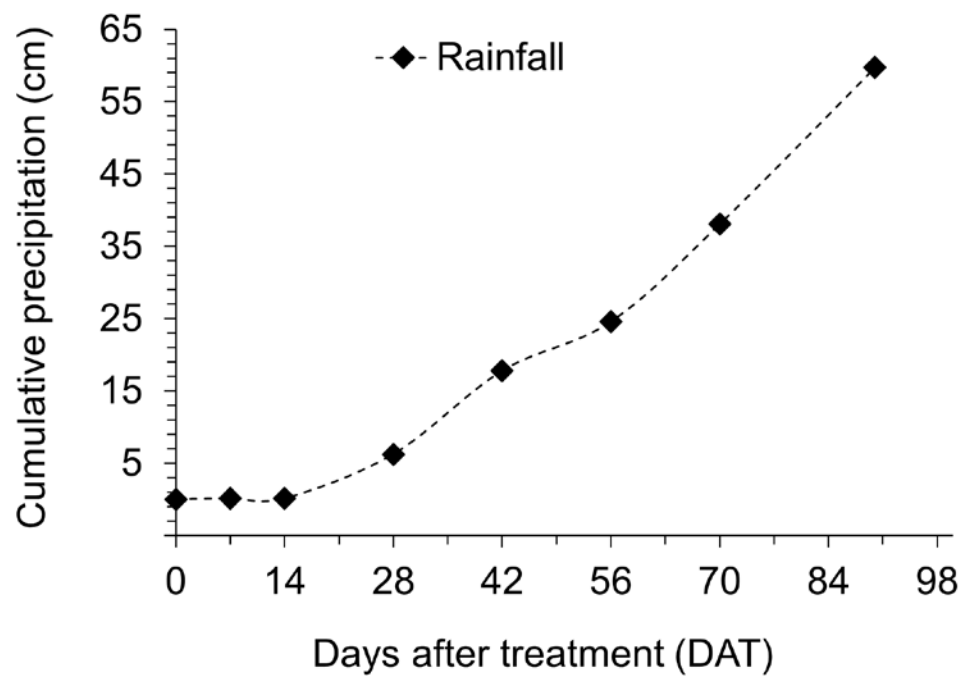

**Figure S1.** Cumulative rainfall received during the field dissipation experiment in citrus orchard. (Data obtained from FAWN, Immokalee, FL)
